# Supplementary material for: Dimethyl fumarate improves cognitive impairment and neuroinflammation in mice with Alzheimer’s disease
Source: Springer Nature journal article supplement (doi:10.1186/s12974-024-03046-2), 2024-02-21
Supplement: 12974_2024_3046_MOESM1_ESM.pdf [file 12974_2024_3046_MOESM1_ESM.pdf]

**Table S1. A list of the primers used for this study**

| Transcript    | Forward                        | Reverse                        |
|---------------|--------------------------------|--------------------------------|
| <i>Hmox1</i>  | 5'-GGACCCATGTCTTCGGAAAT-3'     | 5'-CCCATGACACCTCTCTCCAT-3'     |
| <i>Gclm</i>   | 5'-GCCACCAGATTTGACTGCCTTTG-3'  | 5'-TGCTCTTCACGATGACCGAGTACC-3' |
| <i>H2-d</i>   | 5'-CATTGACCGCTACCTGAAGACC-3'   | 5'-GCCTCCTGTTGGTGAGAATCATG-3'  |
| <i>H2-t23</i> | 5'-TGTCAAGTTCCCAGAAATGTTCCA-3' | 5'-ATGCCGCCGTTCTGAATGA-3'      |
| <i>Gbp2</i>   | 5'-GAACCGCTTCTGGGATTACCTG-3'   | 5'-GCCTTTACTTCCGTCATAGTGTC-3'  |
| <i>C3</i>     | 5'-CCAGCTCCCCATTAGCTCTG-3'     | 5'-GCACTTGCCTCTTTAGGAAGTC-3'   |
| <i>Socs3</i>  | 5'-TACTGAGCCGACCTCTCTC-3'      | 5'-AGCTGGGTCACCTTCTCATA-3'     |
| <i>Gfap</i>   | 5'-ACCAGTGGAGAATCCCCTATAC-3'   | 5'-GCCAAGACTGTAGTGTGGTCA-3'    |
| <i>Nfe2l2</i> | 5'-CTGGAACGGTGAAGGTGACA-3'     | 5'-CGGCCACATTGTGAACCTTG-3'     |
| <i>Nqo1</i>   | 5'-GCGAGAAGAGCCCTGATTGTACTG-3' | 5'-TCTCAAACCAGCCTTTCAGAATGG-3' |
| <i>Osgin1</i> | 5'-CGGTGACATCGCCCACTAC-3'      | 5'-GCTCGGACTTAGCCCACTC-3'      |
| <i>C1qa</i>   | 5'-CTCAGGGATGGCTGGTGGCC-3'     | 5'-CCTTTGAGACCCGGCCTCCCC-3'    |
| <i>C3ar</i>   | 5'-ACCAGTGGAGAATCCCCTATAC-3'   | 5'-GCCAAGACTGTAGTGTGGTCA-3'    |
| <i>Cd11c</i>  | 5'-TCGTATTTGGCTTCCCAGAC-3'     | 5'-CCATCATTAGACACCGTCACAT-3'   |
| <i>Tnf</i>    | 5'-CCCAAGGCGCCAGATC-3'         | 5'-TCGCGGATCATGCTTTCTG-3'      |
| <i>Il1α</i>   | 5'-CGCTTGAGTCGGCAAAGAAAT-3'    | 5'-CTTCCCGTTGCTTGACGTTG-3'     |
| <i>Stat3</i>  | 5'-TAGCCGATTCCTGCAAGAGTCCAA-3' | 5'-CGGGCAATTTCCATTGGCTTCTCA-3' |
| <i>Actb</i>   | 5'-ACCAGTGGAGAATCCCCTATAC-3'   | 5'-GCCAAGACTGTAGTGTGGTCA-3'    |
