# Supplementary material for: Dimethyl fumarate improves cognitive impairment and neuroinflammation in mice with Alzheimer’s disease
Source: Springer Nature journal article supplement (doi:10.1186/s12974-024-03046-2), 2024-02-21
Supplement: 12974_2024_3046_MOESM3_ESM.pdf [file 12974_2024_3046_MOESM3_ESM.pdf]

### Additional file 3 (Supplementary figures)

## Dimethyl fumarate improves cognitive impairment and neuroinflammation in mice with Alzheimer's disease

Ting Wang, Akira Sobue, Seiji Watanabe, Okiru Komine, Takaomi C Saido, Takashi Saito, and Koji Yamanaka

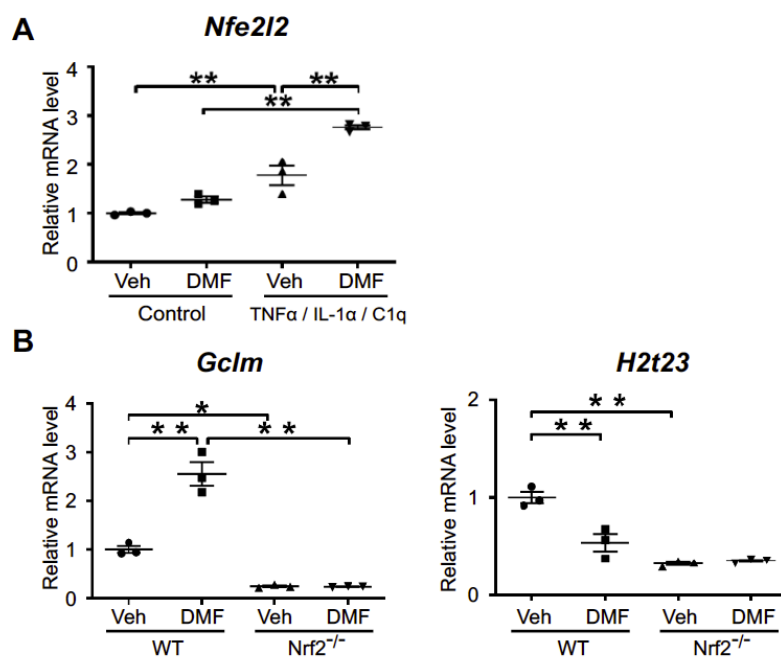

### Figure S1. Dimethyl Fumarate (DMF) activates the Nrf2 pathway and inhibits proinflammatory activation in primary astrocytes

**A.** Expression levels of mRNAs in DMF-treated primary astrocytes determined by quantitative PCR. Relative expression levels for *Nfe2l2* are plotted as means  $\pm$  SEM (Veh-Control: n = 3, DMF-Control: n = 3, Veh-A1 (TNF $\alpha$ /IL-1 $\alpha$ /C1q): n = 3, and DMF-A1 (TNF $\alpha$ /IL-1 $\alpha$ /C1q): n = 3). \*\* $p$  < 0.01, two-way ANOVA.

**B.** Expression levels of mRNAs in A1-induced primary astrocytes derived from WT and Nrf2<sup>-/-</sup> mice determined by quantitative PCR. Relative expression levels for *Gclm* and *H2t23* are plotted as means  $\pm$  SEM (Veh-WT: n = 3, DMF-WT: n = 3, Veh-Nrf2<sup>-/-</sup>: n = 3, and DMF-Nrf2<sup>-/-</sup>: n = 3). \* $p$  < 0.05 and \*\* $p$  < 0.01, two-way ANOVA.

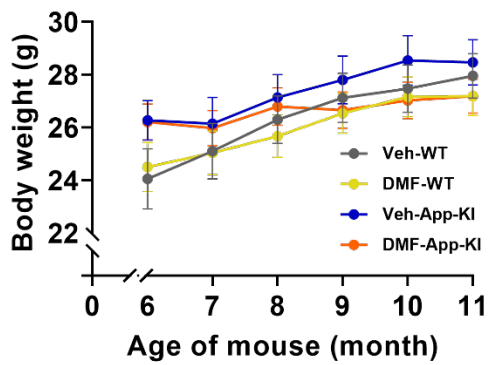

**Figure S2. No difference in the body weight among each group.**

The body weights were quantified and are expressed as means  $\pm$  SEM [Veh-WT (n = 19), DMF-WT (n = 24), Veh-*App*-KI (n = 19), and DMF-*App*-KI (n = 19)]. No statistical significance was found. Repeated measure two-way ANOVA.

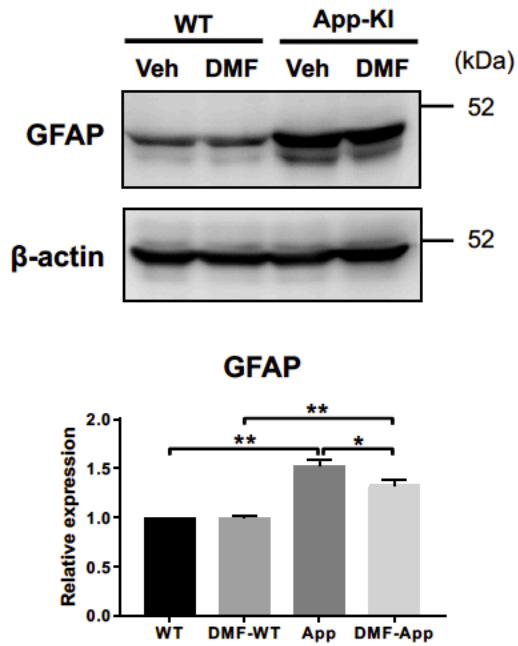

**Figure S3. Glial fibrillary acidic protein suppressed in the cerebral cortices of DMF-administered App-KI mice**

Representative immunoblotting images for GFAP levels in the cerebral cortices of Veh / DMF administered- WT and App-KI mice at 11 months old. Five  $\mu$ g of the protein was loaded per lane. The GFAP levels were quantified and are expressed as means  $\pm$  SEM (J, n=3). \* $p$  < 0.05 and \*\* $p$  < 0.01, two-way ANOVA.
